# Supplementary material for: Fe doped MoS2/polypyrrole microtubes towards efficient peroxidase mimicking and colorimetric sensing application
Source: Royal Society of Chemistry journal article supplement (doi:10.1039/d1dt02757c), 2021-01-01
Supplement: d1dt02757c1.pdf [file d1dt02757c1.pdf]

## Supporting Information

### Fe doped MoS<sub>2</sub>/Polypyrrole nanotubes towards efficient Peroxidase

#### Mimicking and Colorimetric Sensing Application

Houji Peng<sup>a</sup>, Jing Zheng<sup>a</sup>, Baishun Zhang<sup>b\*</sup>, Jingli Xu<sup>a</sup>, Min Zhang<sup>a\*</sup>

<sup>a</sup> College of Chemistry and Chemical Engineering, Shanghai University of Engineering Science, Shanghai 201620, PR China. E-mail: [zhangmin@sues.edu.cn](mailto:zhangmin@sues.edu.cn).

<sup>b</sup> Anhui Institute of Public Security Education, 559 Wangjiang West Road, Hefei, Anhui 230088, PR China. E-mail: [zbs01@163.com](mailto:zbs01@163.com)

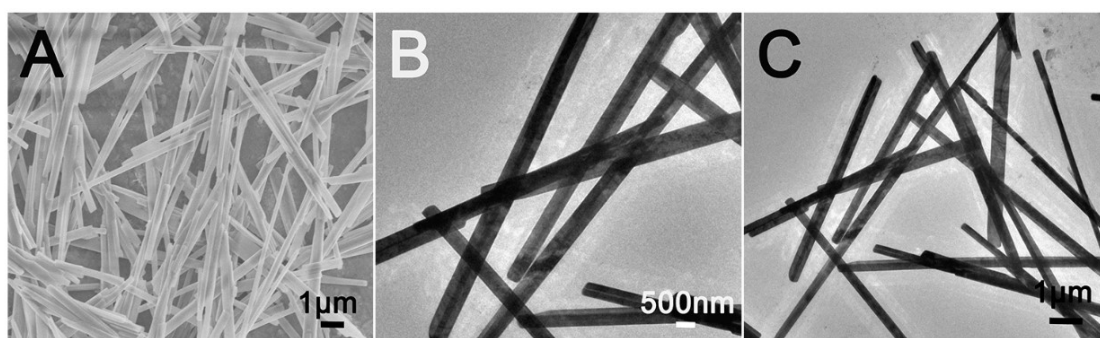

Fig. S1 SEM and TEM images of MoO<sub>3</sub> (A, B, C)

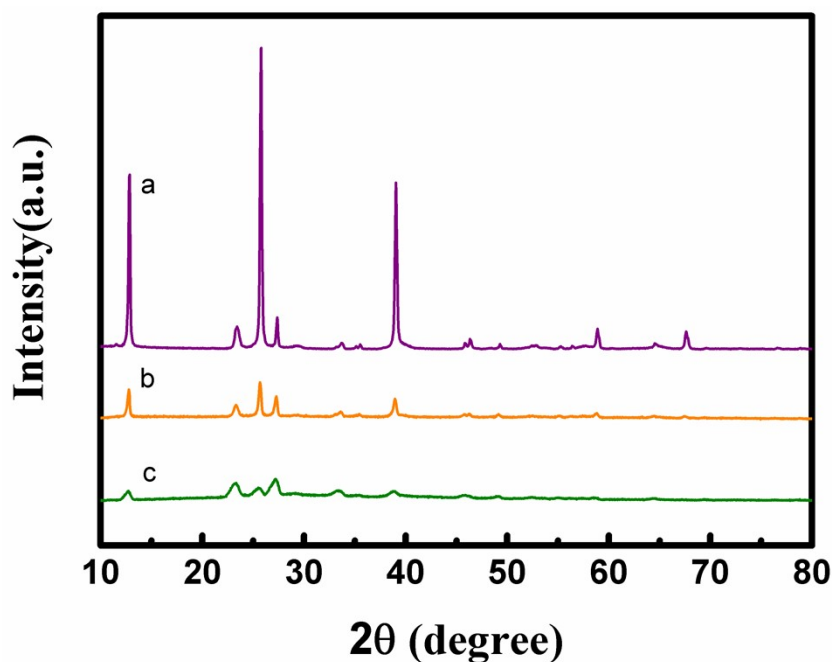

Fig. S2 X-ray of diffraction patterns for MoO<sub>3</sub>(a); MoO<sub>3</sub>@FeOOH (b); MoO<sub>3</sub>@FeOOH@PPy(c)

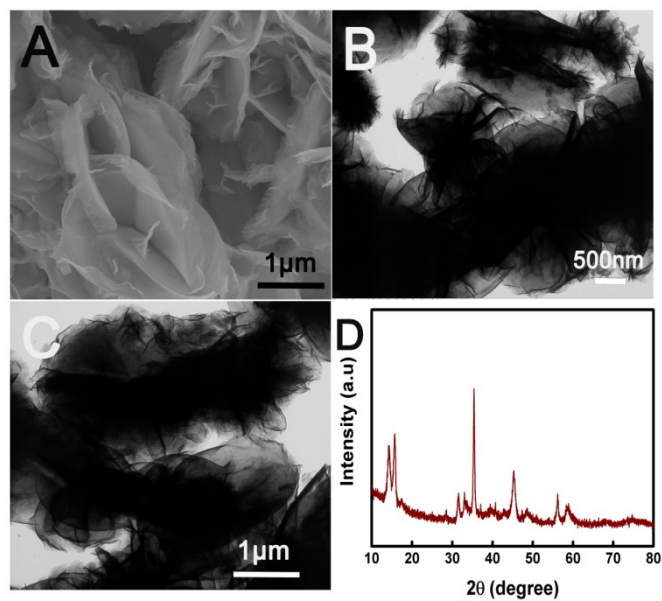

**Fig. S3** SEM and TEM images of MoFeS<sub>x</sub> composites(A,B,C), XRD of diffraction patterns MoFeS<sub>x</sub> composites (D)

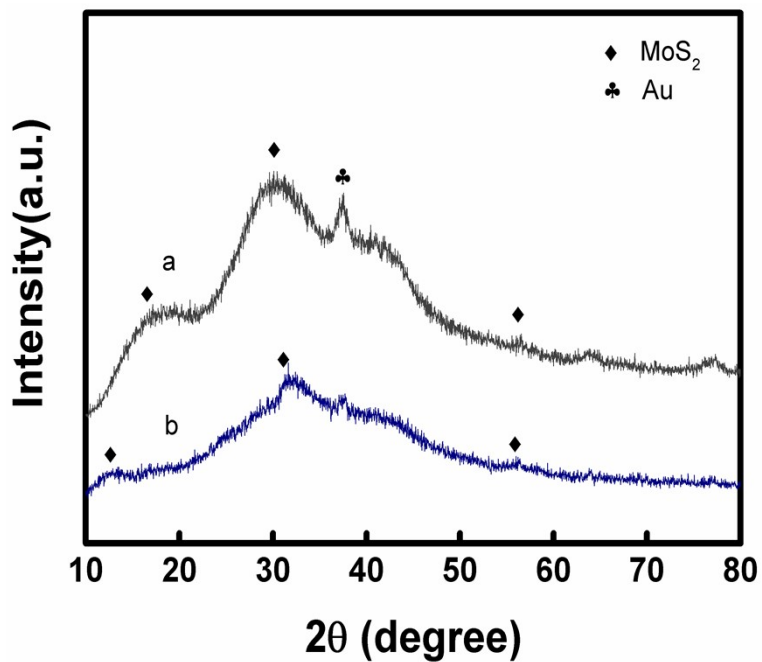

**Fig. S4** X-ray of diffraction patterns for Fe-MoS<sub>2</sub>/Au@PPy microtubes (a); Fe-MoS<sub>2</sub>/Ag@PPy microtubes(b)

**Table S1.** Comparison of L-cysteine detection results for various enzyme mimics and Fe-MoS<sub>2</sub>@PPy microtubes

| Nanocomposite            | Linear range (μM) | Detection limit (μM) | Reference |
|--------------------------|-------------------|----------------------|-----------|
| NiO NFs                  | 20–100            | 1.1                  | [1]       |
| Ce-DMTDC                 | 0–1.0             | 0.15                 | [2]       |
| Fe-MIL-88NH <sub>2</sub> | 1–80              | 0.39                 | [3]       |
| CuSe                     | 0.5–20            | 0.20                 | [4]       |
| UiO-66(NH <sub>2</sub> ) | 5–120             | 0.30                 | [5]       |
| Fe-MoS <sub>2</sub> @PPy | 10–100            | 0.10                 | This work |

## References

- 1 C. Ray, S. Dutta, S. Sarkar, R. Sahoo and A. Roy, T. Pal, *J. Mater.Chem. B*, 2014, **2**, 6097.
- 2 R. Dalapati, S. Balasubramanian, M. K. Ghosalya, A. Dhakshinamoorthy and S. Biswas, *CrystEngComm*, 2017, **19**, 5915.
- 3 Z. Jiang, Y. Liu, X. Hua and Y. Li, *Anal. Methods*, 2014, **6**, 5647.
- 4 M.Bai, C. Xu, X. Huang, J. Wan and Y. Liu, *Journal of nanoscience and nanotechnology*, 2020, **20** , 5369-5375.
- 5 Z. Hu, X. Jiang, F. Xu, J. Jia, Z. Long and X. Hou, *Talanta*, 2016, **158**, 276.
